# Supplementary material for: Iron isotopic composition of blood serum in anemia of chronic kidney disease
Source: Royal Society of Chemistry journal article supplement (doi:10.1039/c7mt00021a), 2017-01-01
Supplement: c7mt00021a1.pdf [file c7mt00021a1.pdf]

## Supplementary Information

### Iron isotopic composition of blood serum in anemia of chronic kidney disease

Yulia Anoshkina<sup>1</sup>, Marta Costas-Rodríguez<sup>1</sup>, Marijn Speeckaert<sup>2</sup>, Wim Van Biesen<sup>2</sup>, Joris Delanghe<sup>3</sup> and Frank Vanhaecke<sup>1</sup>

#### Tables

**Table S1. Instrument settings and acquisition parameters for MC-ICP-MS Neptune (A) and SF-ICP-MS Element XR (B)**

| (A) Neptune MC-ICP-MS                      |                                                                                                                                        |
|--------------------------------------------|----------------------------------------------------------------------------------------------------------------------------------------|
| RF power (W)                               | 1,275                                                                                                                                  |
| Guard electrode                            | Connected                                                                                                                              |
| Sample and skimmer cones                   | Thermo jet sampler and X-type skimmer, 1.1 and 0.8 mm of orifice diameter, respectively; Ni                                            |
| Lens settings                              | Optimized for maximum Fe <sup>+</sup> signal intensity                                                                                 |
| Ar flow-rates (L min <sup>-1</sup> ):      |                                                                                                                                        |
| plasma gas                                 | 15                                                                                                                                     |
| auxiliary gas                              | 0.75                                                                                                                                   |
| nebulizer gas                              | 0.9-1.0                                                                                                                                |
| Sample uptake rate (μL min <sup>-1</sup> ) | 100                                                                                                                                    |
| Resolution mode                            | Medium (pseudo)                                                                                                                        |
| Acquisition mode                           | Static; multi-collection                                                                                                               |
| Number of blocks                           | 9                                                                                                                                      |
| Number of cycles                           | 5                                                                                                                                      |
| Integration time (s)                       | 4.194                                                                                                                                  |
| Cup configuration                          | L4: <sup>54</sup> Fe; L2: <sup>56</sup> Fe; L1: <sup>57</sup> Fe; C: <sup>58</sup> (Fe+Ni); H1: <sup>60</sup> Ni; H3: <sup>62</sup> Ni |
| (B) Element XR SF-ICP-MS                   |                                                                                                                                        |
| RF power (W)                               | 1,250                                                                                                                                  |
| Guard electrode                            | Connected                                                                                                                              |
| Sample and skimmer cones                   | Ni, 1.1 mm and 0.8 mm orifice diameter                                                                                                 |
| Lens settings                              | Optimized for maximum signal intensity                                                                                                 |
| Ar flow-rates (L min <sup>-1</sup> ):      |                                                                                                                                        |
| plasma gas                                 | 15                                                                                                                                     |
| auxiliary gas                              | 0.8-0.9                                                                                                                                |
| nebulizer gas                              | 1.0-1.1                                                                                                                                |
| Sample uptake rate (μL min <sup>-1</sup> ) | 200                                                                                                                                    |
| Resolution mode                            | Low, medium, high                                                                                                                      |
| Acquisition mode                           | E-scan                                                                                                                                 |
| Dwell time per point (ms)                  | 10                                                                                                                                     |
| Points per peak                            | 20                                                                                                                                     |
| Number of runs                             | 5                                                                                                                                      |
| Number of passes                           | 5                                                                                                                                      |

**Table S2. Iron isotopic composition and clinical parameters in renal insufficiency and Fe disorders patients.** SCr – serum creatinine, eGFR - estimated glomerular filtration rate, Hb – hemoglobin, [Fe] – Fe concentration in serum, Fer– ferritin, Tf – transferrin, TIBC - total iron-binding capability, TSAT - transferrin saturation, sTfR - soluble transferrin receptor, CRP - C-reactive protein. Delta Fe values are expressed as average  $\pm$  2 s.d.

| Diagnosis                               | Sample label | $\delta^{56}\text{Fe}$ | SCr mg dL <sup>-1</sup> | eGFR mL min <sup>-1</sup> per 1.73 m <sup>2</sup> | Hb g dL <sup>-1</sup> | [Fe] $\mu\text{g dL}^{-1}$ | Fer ng mL <sup>-1</sup> | Tf g L <sup>-1</sup> | TIBC <sup>a</sup> $\mu\text{g dL}^{-1}$ | TSAT % | sTfR mg L <sup>-1</sup> | CRP mg dL <sup>-1</sup> |
|-----------------------------------------|--------------|------------------------|-------------------------|---------------------------------------------------|-----------------------|----------------------------|-------------------------|----------------------|-----------------------------------------|--------|-------------------------|-------------------------|
| CKD,<br>no anemia,<br>no ID             | 1            | -2.08 $\pm$ 0.03*      | 1.70                    | 42.9                                              | 13.6                  | 90                         | 42                      | 2.39                 | 294                                     | 30     | 1.49                    | 2.4                     |
|                                         | 2            | -2.72 $\pm$ 0.01*      | 2.72                    | 29.8                                              | 15.0                  | -                          | -                       | -                    | -                                       | 37     | 1.15                    | 0.7                     |
|                                         | 3            | -2.34 $\pm$ 0.04       | 2.55                    | 36                                                | 15.1                  | 93                         | 91                      | 2.39                 | 294                                     | 31     | 1.67                    | 2.8                     |
|                                         | 4            | -2.54 $\pm$ 0.17*      | 2.05                    | 31.9                                              | 14.3                  | 102                        | 95                      | 3                    | 369                                     | 27     | 1.19                    | 5                       |
|                                         | 5            | -2.53 $\pm$ 0.11*      | 2.35                    | 25.5                                              | 13.0                  | 76                         | 253                     | 1.94                 | 238                                     | 31     | 1.2                     | 8.3                     |
|                                         | 6            | -2.34 $\pm$ 0.04       | 3.14                    | 17.3                                              | 12.7                  | 50                         | 177                     | 1.79                 | 220                                     | 22     | 1.8                     | 6                       |
|                                         | 7            | -2.20 $\pm$ 0.08*      | 2.11                    | 29.7                                              | 12.5                  | 86                         | 115                     | 2.21                 | 272                                     | 31     | 1.03                    | 1.1                     |
|                                         | 8            | -2.85 $\pm$ 0.05       | 1.62                    | 40.9                                              | 13.1                  | 88                         | 176                     | 2.16                 | 265                                     | 32     | 1.46                    | 2.1                     |
|                                         | 9            | -2.13 $\pm$ 0.05       | 1.58                    | 38.2                                              | 13.7                  | -                          | -                       | -                    | -                                       | 31     | 1.03                    | 3.6                     |
|                                         | 10           | -2.20 $\pm$ 0.05*      | 1.24                    | 53                                                | 13.6                  | 91                         | 65                      | 3.06                 | 376                                     | 24     | 1.32                    | 4.2                     |
|                                         | 11           | -2.35 $\pm$ 0.12*      | 1.51                    | 46                                                | 14.4                  | 83                         | 54                      | 2.53                 | 311                                     | 26     | 0.82                    | 2.1                     |
|                                         | 12           | -2.17 $\pm$ 0.04       | 1.96                    | 36.2                                              | 12.7                  | 73                         | 177                     | 2.64                 | 324                                     | 22     | 1.24                    | <0.6                    |
|                                         | 13           | -1.30 $\pm$ 0.04*      | 1.89                    | 32.4                                              | 12.7                  | 69                         | 125                     | 2.6                  | 319                                     | 21     | 1.89                    | 4.4                     |
|                                         | 14           | -2.56 $\pm$ 0.06*      | 1.47                    | 40.4                                              | 12.8                  | 71                         | 155                     | 2.42                 | 297                                     | 23     | 1.84                    | <0.6                    |
| CKD,<br>no anemia,<br>ID                | 15           | -2.02 $\pm$ 0.02*      | 1.65                    | 41.9                                              | 13.2                  | 101                        | 42                      | -                    | -                                       | 15     | 1.92                    | 2.7                     |
|                                         | 16           | -2.35 $\pm$ 0.03*      | 1.69                    | 36.6                                              | 14.9                  | 64                         | 91                      | 2.98                 | 366                                     | 17     | 1.73                    | 3.5                     |
|                                         | 17           | -2.35 $\pm$ 0.14*      | 1.78                    | 34.7                                              | 13.1                  | 59                         | 46                      | 2.38                 | 292                                     | 20     | 1.68                    | 1                       |
|                                         | 18           | -2.14 $\pm$ 0.03       | 2.19                    | 27                                                | 17.7                  | 68                         | 130                     | 3.19                 | 392                                     | 17     | -                       | 2.5                     |
|                                         | 19           | -1.29 $\pm$ 0.03       | 1.46                    | 34                                                | 13.2                  | 54                         | 72                      | 2.52                 | 310                                     | 17     | 1.61                    | 6.3                     |
|                                         | 20           | -1.87 $\pm$ 0.04*      | 1.43                    | 43                                                | 12.7                  | 28                         | 75                      | 3.55                 | 436                                     | 6      | 3.02                    | 11.1                    |
|                                         | 21           | -1.44 $\pm$ 0.03       | 1.31                    | 53                                                | 14.5                  | 40                         | 53                      | 3.09                 | 380                                     | 11     | 1.43                    | 11.3                    |
|                                         | 22           | -1.80 $\pm$ 0.03       | 1.31                    | 51                                                | 13.1                  | 20                         | 13                      | 3.15                 | 387                                     | 5      | -                       | 1.8                     |
|                                         | 23           | -1.62 $\pm$ 0.03       | 1.41                    | 50                                                | 15.2                  | 50                         | 95                      | 2.45                 | 301                                     | 17     | 1.65                    | 3.5                     |
| CKD,<br>EPO-related<br>anemia, no<br>ID | 24           | -1.86 $\pm$ 0.04       | 1.60                    | 39.8                                              | 12.1                  | 102                        | 54                      | 2.74                 | 336                                     | 30     | 1.24                    | 3                       |
|                                         | 25           | -2.48 $\pm$ 0.05       | 1.68                    | 38.9                                              | 12.3                  | 56                         | 68                      | 2.26                 | 278                                     | 20     | 1.44                    | 0.7                     |
|                                         | 26           | -2.63 $\pm$ 0.02*      | 2.87                    | 21.1                                              | 11.6                  | 79                         | 260                     | 2.34                 | 288                                     | 27     | 1.58                    | -                       |
|                                         | 27           | -2.16 $\pm$ 0.03*      | 1.65                    | 37                                                | 10.9                  | 73                         | -                       | -                    | -                                       | 28     | 1.28                    | 0.1                     |
|                                         | 28           | -2.55 $\pm$ 0.13*      | 1.49                    | 44.5                                              | 11.5                  | 119                        | -                       | -                    | -                                       | 28     | 1.10                    | 1.5                     |
|                                         | 29           | -2.13 $\pm$ 0.04       | 2.19                    | 30.5                                              | 11.2                  | 98                         | 220                     | 2.58                 | 317                                     | 30     | 1.05                    | <0.6                    |
|                                         | 30           | -2.45 $\pm$ 0.04       | 2.49                    | 28.7                                              | 11.1                  | 43                         | -                       | -                    | -                                       | 21     | 2.83                    | 18.5                    |
|                                         | 31           | -2.56 $\pm$ 0.05*      | 2.48                    | 23.3                                              | 11.6                  | 66                         | 60                      | 2.72                 | 334                                     | 20     | 1.37                    | 0.2                     |
|                                         | 32           | -2.24 $\pm$ 0.04       | 2.99                    | 18.4                                              | 11.7                  | 56                         | 173                     | 2.57                 | 316                                     | 32     | 1.51                    | 2                       |

| Diagnosis            | Sample label | $\delta^{56}\text{Fe}$ | SCr<br>mg dL <sup>-1</sup> | eGFR mL min <sup>-1</sup><br>per 1.73 m <sup>2</sup> | Hb<br>g dL <sup>-1</sup> | [Fe]<br>$\mu\text{g dL}^{-1}$ | Fer<br>ng mL <sup>-1</sup> | Tf<br>g L <sup>-1</sup> | TIBC <sup>a</sup><br>$\mu\text{g dL}^{-1}$ | TSAT %         | sTfR<br>mg L <sup>-1</sup> | CRP<br>mg dL <sup>-1</sup> |
|----------------------|--------------|------------------------|----------------------------|------------------------------------------------------|--------------------------|-------------------------------|----------------------------|-------------------------|--------------------------------------------|----------------|----------------------------|----------------------------|
|                      | 33           | -2.70 ± 0.05           | 6.44                       | 8.3                                                  | 9.9                      | 61                            | 243                        | 2.03                    | 249                                        | 24             | 1.26                       | 0.9                        |
| CKD, IDA             | 34           | -1.14 ± 0.05           | 1.73                       | 40.5                                                 | 10.9                     | 41                            | 33                         | 2.83                    | 348                                        | 11             | 1.76                       | -                          |
|                      | 35           | -1.52 ± 0.03           | 1.95                       | 31                                                   | 10.8                     | 42                            | 33                         | 3.21                    | 394                                        | 10             | 2.00                       | 14.2                       |
|                      | 36           | -1.76 ± 0.06           | 1.67                       | 42.1                                                 | 11.2                     | 31                            | -                          | 3.03                    | 372                                        | 8              | 2.74                       | 0.4                        |
|                      | 37           | -0.73 ± 0.04           | 2.28                       | 27                                                   | 8.1                      | 19                            | 23                         | 2.93                    | 360                                        | 5              | 4.00                       | 7.1                        |
|                      | 38           | -1.79 ± 0.03           | 2.26                       | 28                                                   | 10.0                     | 39                            | 10                         | 3.30                    | 405                                        | 10             | 2.23                       | 6.5                        |
|                      | 39           | -2.09 ± 0.03           | 1.36                       | 34                                                   | 11.9                     | 44                            | 177                        | 2.42                    | 297                                        | 15             | 1.37                       | 13                         |
|                      | 40           | -1.36 ± 0.03*          | 2.11                       | 28                                                   | 11.6                     | 47                            | 13                         | 2.95                    | 362                                        | 13             | -                          | 2                          |
|                      | 41           | -1.99 ± 0.06           | 1.44                       | 50                                                   | 9.4                      | 11                            | 180                        | 1.83                    | 225                                        | 5              | 2.26                       | 31.4                       |
|                      | 42           | -1.14 ± 0.04           | 1.41                       | 50                                                   | 12.4                     | 24                            | 9                          | 3.12                    | 383                                        | 6              | 1.12                       | -                          |
|                      | 43           | -1.35 ± 0.04           | 1.43                       | 49                                                   | 9.4                      | 39                            | 11                         | 3.83                    | 471                                        | 8              | 2.20                       | <0.6                       |
|                      | 44           | -1.27 ± 0.03           | 0.95                       | 54                                                   | 11.5                     | 25                            | 111                        | 1.90                    | 233                                        | 11             | 2.69                       | 8.3                        |
| ID                   | 45           | -2.76 ± 0.04           | 0.92                       | >90                                                  | 13.8                     | 49                            | 446                        | 2.13                    | 262                                        | 18             | 1                          | 0.7                        |
|                      | 46           | -2.13 ± 0.08*          | 0.81                       | >90                                                  | 14.4                     | 53                            | 130                        | 2.47                    | 303                                        | 17             | 1.97                       | 21                         |
|                      | 47           | -1.91 ± 0.09*          | 1.12                       | 70                                                   | 13.4                     | 60                            | 22                         | 2.88                    | 354                                        | 16             | 1.34                       | 0.7                        |
|                      | 48           | -2.11 ± 0.05*          | 0.98                       | 83                                                   | 12.6                     | 74                            | 87                         | 3.11                    | 382                                        | 19             | 1.21                       | 3.9                        |
|                      | 49           | -1.93 ± 0.05*          | 0.84                       | 89                                                   | 13.1                     | 52                            | 36                         | 3.45                    | 424                                        | 12             | 1.49                       | 2.5                        |
|                      | 50           | -1.86 ± 0.04           | 0.69                       | 88                                                   | 14.2                     | 37                            | 12                         | 3.39                    | 416                                        | 9              | -                          | -                          |
| IDA                  | 51           | -1.29 ± 0.12*          | 1.26                       | 61                                                   | 11.9                     | 28                            | 20                         | 3.01                    | 370                                        | 7              | -                          | 2.8                        |
|                      | 52           | -1.80 ± 0.06*          | 0.95                       | 82                                                   | 11.9                     | 41                            | 10                         | 3.41                    | 419                                        | 9              | 2.66                       | <0.6                       |
|                      | 53           | -0.77 ± 0.03           | 0.88                       | 86                                                   | 8.6                      | 18                            | 6                          | 3.00                    | 369                                        | 4              | 4.42                       | 4.5                        |
|                      | 54           | -1.80 ± 0.03           | 0.76                       | 76                                                   | 10.3                     | 45                            | 37                         | 3.05                    | 375                                        | 12             | -                          | -                          |
|                      | 55           | -0.32 ± 0.03           | 0.83                       | >90                                                  | 10.3                     | 16                            | 9                          | 2.89                    | 355                                        | 5              | 3.18                       | 2.8                        |
|                      | 56           | -0.86 ± 0.06           | 0.98                       | 70                                                   | 7.5                      | 9                             | 7                          | 3.21                    | 394                                        | 2              | 3.82                       | <0.6                       |
|                      | 57           | -1.51 ± 0.04           | 1.05                       | 67                                                   | 7.5                      | 18                            | 10                         | 3.36                    | 413                                        | 4              | 3.82                       | 4.5                        |
| <i>Normal values</i> |              |                        | <i>0.6 - 1.2</i>           | <i>&gt; 90</i>                                       | <i>&gt; 12.5</i>         | <i>65 - 177</i>               | <i>15-200</i>              | <i>2 - 3.6</i>          | <i>280 - 436</i>                           | <i>20 - 45</i> | <i>1.8 - 4.6</i>           | <i>&lt; 0.6</i>            |

<sup>a</sup> TIBC calculated according to H. Yamanishi *et al.* Clin. Chem. 2003, 49, 175-178.

- No data available

\* Data based on duplicate measurement
